# Supplementary material for: The chemical armament of reef-building corals: inter- and intra-specific variation and the identification of an unusual actinoporin in Stylophora pistilata
Source: PubMed Central journal article supplement (PMC5762905; doi:10.1038/s41598-017-18355-1), 2018-01-10
Supplement: 41598_2017_18355_MOESM1_ESM.pdf [file 41598_2017_18355_MOESM1_ESM.pdf]

**The chemical armament of reef-building corals: inter- and intra-specific variation and the identification of an unusual actinoporin in *Stylophora pistilata*.**

Hanit Ben-Ari<sup>1,2,+</sup>, Moran Paz<sup>1,+</sup> and Daniel Sher<sup>1\*</sup>

<sup>1</sup>Department of Marine Biology, Leon H. Charney School of Marine Sciences, University of Haifa, Haifa, Israel; <sup>2</sup>The Interuniversity Institute for Marine Sciences, Eilat, Israel.

<sup>+</sup> These two authors contributed equally to the study

<sup>\*</sup> To whom correspondence should be addressed: Daniel Sher, <sup>1</sup>Department of Marine Biology, Leon H. Charney School of Marine Sciences, University of Haifa, Haifa, Israel. [dsher@univ.haifa.ac.il](mailto:dsher@univ.haifa.ac.il)

Supplementary information

- 1) Table with number of actinoporins in different cnidarian transcriptomes
- 2) FASTA file (separate) including the sequences of the actinoporins

| Species                        | Number of putative actinoporins |
|--------------------------------|---------------------------------|
| <i>Acropora digitifera</i>     | 1                               |
| <i>Acropora hyacinthus</i>     | 0                               |
| <i>Acropora millepora</i>      | 1                               |
| <i>Acropora palmata</i>        | 1                               |
| <i>Acropora tenuis</i>         | 1                               |
| <i>Astreopora</i> sp           | 1                               |
| <i>Favia</i> sp                | 2                               |
| <i>Fungia scutaria</i>         | 1                               |
| <i>Madracis auretenra</i>      | 1                               |
| <i>Montastraea cavernosa</i>   | 3                               |
| <i>Montastraea faveolata</i>   | 2                               |
| <i>Platygyra carnosus</i>      | 4                               |
| <i>Pocillopora damicornis</i>  | 2                               |
| <i>Porites astreoides</i>      | 2                               |
| <i>Porites australiensis</i>   | 6                               |
| <i>Porites lobata</i>          | 4                               |
| <i>Pseudodiploria strigosa</i> | 1                               |
| <i>Seriatopora hystrix</i>     | 1                               |
| <i>Seriatopora</i> sp          | 4                               |
| <i>Stylophora pistillata</i>   | 2                               |
